# Supplementary material
Source: Springer Nature journal article supplement (https://www.springermedizin.de/resource/supplementary/12955_2005_196_MOESM1_ESM.pdf/9559876)
Supplement: MOESM1 [file 9559876]

157 patients enrolled

```
graph TD; A[157 patients enrolled] --> B[52 randomized to TMP /SMZ. 2 lost to follow-up and 1 had symptoms resolve before receiving treatment.]; A --> C[54 randomized to Ciprofloxacin. 4 lost to follow-up]; A --> D[51 randomized to Nitrofurantoin. 3 lost to follow-up and 1 scheduled for surgery ;surgeon request different treatment]; B --> E[146 analyzed for outcome and adverse events]; C --> E; D --> E;
```

52 randomized to  
TMP /SMZ.  
2 lost to follow-up  
and 1 had  
symptoms resolve  
before receiving  
treatment.

54 randomized to  
Ciprofloxacin.  
4 lost to follow-up

51 randomized  
to Nitrofurantoin  
3 lost to follow-  
up and 1  
scheduled for  
surgery ;surgeon  
request different  
treatment

146 analyzed  
for outcome  
and adverse  
events
